# Supplementary material
Source: ML conference proceedings conference paper supplement (https://openaccess.thecvf.com/content/WACV2022/html/Mall_Discovering_Underground_Maps_WACV_2022_paper.html)
Supplement: Supplementary file 1 [file Mall_Discovering_Underground_Maps_WACV_2022_supplemental.zip]

## Supplementary Material for: “Discovering Underground Maps from Fashion”

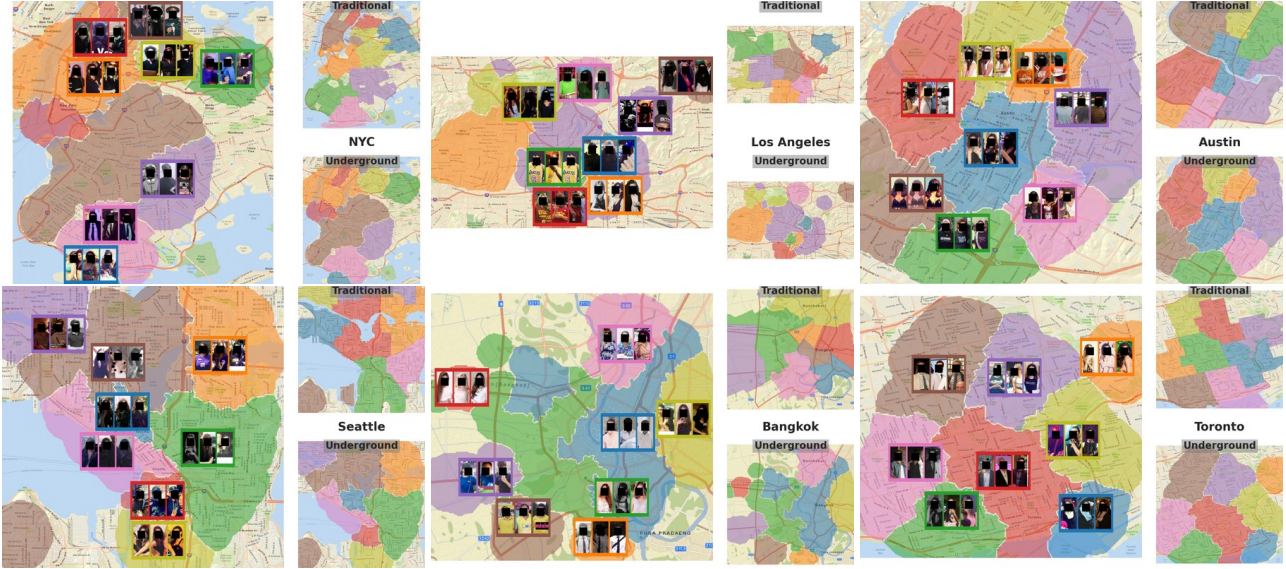

Figure 1: Underground maps in contrast with the traditional maps for 6 cities. Our method can discover neighborhoods based on activities like student neighborhoods in Los Angeles (red), Austin (orange) and Seattle (orange) by looking at the fashion sense. It also discovers tourist neighborhoods of NYC (red), Seattle (Pink).

In this supplementary document we present some of the results that we could not present in the main paper. Please also refer to the [video](#) along with this supplementary to explore a wide range of results.

Sec. 1 shows underground maps for many cities discovered by our method. In Sec. 2, we present additional implementation details about the benchmark creation and getting unbiased locations. Sec. 3 refers to the list of cities used for different types of analysis in our results. In Sec. 4 we break down the performance of our method further for each city and for each class of HM benchmark. In Sec. 5 we conduct various ablation studies by measuring the effect of different hyperparameters on our method. Sec. 6 shows how we collected data for experiments with local human judges. In Sec. 7 we present additional qualitative results of unique, similar, and analogical neighborhoods found by our method. Finally, in Sec. 8 we discuss other variants we tried for grouping localized features.

### 1. Underground Maps

Figure 1 shows the underground maps for 6 cities and contrasts them with their traditional maps. Our method discovers similarity across regions that are geographically far apart. For example, for Bangkok it finds 2 regions (colored blue) that are geographically far away, but people wear similar clothing. Also these maps have very different boundaries than a traditional map.

Our method can shed light on a city by discovering many non-obvious insights in a city. Figure 2 show underground maps of some cities where our discovered maps can reveal many things about a city. Here we discuss them in more details.

**Delhi:** It discovers traditional vs. Westernized neighborhoods. People in the southern neighborhood are seen in Western

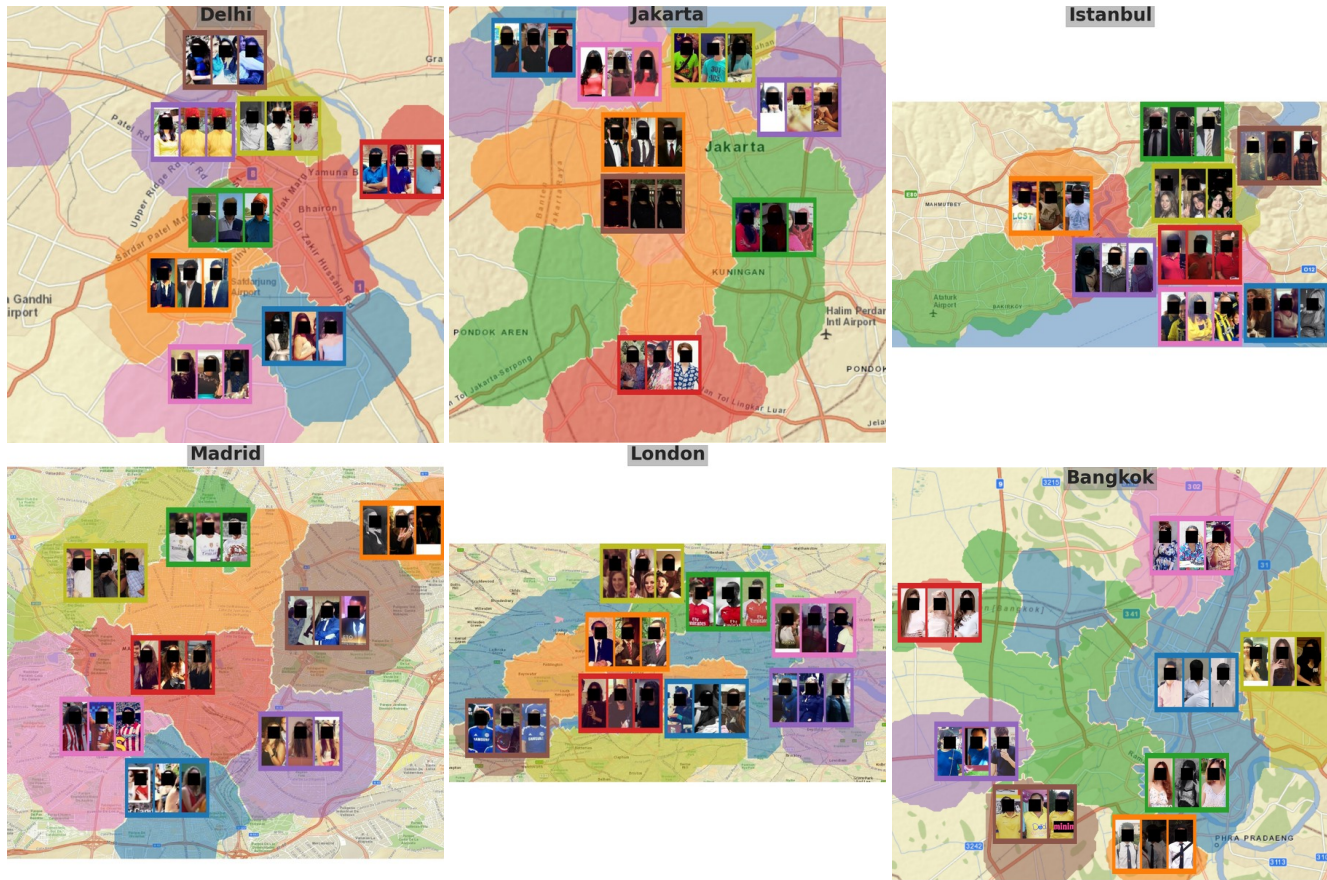

Figure 2: Our maps can reveal unexpected insights about a city. For example, in Delhi and Bangkok our method indicates how the city expanded over time. In Istanbul and London, our method finds out business neighborhoods that are geographically far apart but similar. In London and Madrid, we discover neighborhoods of popular football clubs. In Jakarta we discover tourist neighborhoods are found closer to the beaches and museums.

clothing more than the northern ones, explainable by the fact that the city expanded from north to south as it grew.<sup>1</sup>

**Jakarta:** We discover areas popular among tourists (pink and yellow) in the north closer to beaches and museums. In South Jakarta more people can be seen wearing traditional Indonesian clothing (red) as well as in southeast and southwest neighborhoods (shown in green).

**Istanbul:** We discover two far-apart but similar neighborhoods (green) that are popular business neighborhoods. Both the neighborhood west (Bakirkoy)<sup>2</sup> and north (Sisly)<sup>3</sup>. We also discover tourist neighborhoods (red) near the popular tourist areas of Fatih and Beyoglu.<sup>4</sup>

**Madrid:** We discover two neighborhoods with stadiums and fans of two different football clubs: Real Madrid (green) and Atletico Madrid (pink). These neighborhoods are different from other neighborhoods in the city, like the neighborhood with many nightclubs and pubs (red).

**London:** We find commercial neighborhoods in Central London (Square Mile and London Bridge) and West London (West End) marked in orange, where people can be seen wearing suits. Similar to Madrid, London also has popular football clubs; hence we find neighborhoods of those clubs Chelsea (brown) in the west and Arsenal (green) in the north.

**Bangkok:** Expansion of a city can also explain the pattern in Bangkok from traditional neighborhood (pink) vs westernized neighborhood (yellow).

<sup>1</sup><https://earthobservatory.nasa.gov/images/92813/urban-growth-of-new-delhi>

<sup>2</sup><https://wikipedia.org/wiki/Bak%C4%B1rk%C3%B6y>

<sup>3</sup><https://wikipedia.org/wiki/%c5%9ei%c5%9fli>

<sup>4</sup><https://wikipedia.org/wiki/Beyo%C4%9Flu>

Figures 7 and 8 show the underground maps for other cities. Again, our method discovers similarity across regions that are geographically far apart, and can find some very specific neighborhoods.

## 2. Additional Implementation Details

### 2.1. Creation of BD Benchmark

In this section we present more information on how the BD Benchmark is created.

To create regions over maps using business density, we follow our method from Sec. 3 (main paper), with a few differences. First, since we need to segment on the basis of business density, the featurization of a region on the map is the normalized histogram of different businesses. Second, to keep the similarity of the two benchmarks, rather than sampling a circular radius around a point, we sample a square region of length and width  $0.01^\circ$ . Finally, we do not know the number of neighborhoods (unlike the HoodMaps Benchmark, where the number of labels is given). So we use affinity propagation for clustering instead of K-means to find the ideal number of neighborhoods per city. Affinity propagation produces a min/max/median of 3/6/6 types of regions per city.

### 2.2. Getting Unbiased Locations

The samples within the radius  $r$  are not going to be distributed uniformly around  $\mathbf{x}$ . These samples will be biased towards certain directions on the map. For example, if we sample for a location at the junction of land and sea, almost no images will be sampled from sea, hence, the location of the image samples would be biased towards land. The mean of the sampled image location would be the coordinate for which these samples are unbiased. Therefore, we use the new unbiased location in the pipeline instead of the sampling location. The histogram description  $\mathbf{h}_x$  is an unbiased descriptor of this location  $\mathbf{x}'$  hence these location is used in the later stages of the pipeline.  $T(\mathbf{x})$  are the set of images that describes the sampled location  $\mathbf{x}$ :

$$T(\mathbf{x}) = \{I_i : \|\mathbf{l}_i - \mathbf{x}\|_2 < r\} \quad (1)$$

The unbiased location is:

$$\mathbf{x}' = \frac{\sum_{I_i \in T(\mathbf{x})} \mathbf{l}_i}{|T(\mathbf{x})|} \quad (2)$$

## 3. List of Cities

|         |           |         |           |             |           |              |             |
|---------|-----------|---------|-----------|-------------|-----------|--------------|-------------|
| Austin  | Bangkok   | Beijing | Berlin    | Bogotá      | Budapest  | Buenos Aires | Cairo       |
| Chicago | Delhi     | Dhaka   | Guangzhou | Istanbul    | Jakarta   | Johannesburg | Karachi     |
| Kyiv    | Kolkata   | Lagos   | London    | Los Angeles | Madrid    | Manila       | Mexico City |
| Milan   | Moscow    | Mumbai  | Nairobi   | NYC         | Osaka     | Paris        | Rio         |
| Rome    | São Paulo | Seattle | Seoul     | Shanghai    | Singapore | Sofia        | Sydney      |
| Tianjin | Tokyo     | Toronto | Vancouver |             |           |              |             |

Table 1: Cities in our analysis. Cities colored blue and red are evaluated quantitatively using both the HM and BD benchmarks. Cities colored red have administrative boundary data available and so are evaluated for the right hand side of Table 1 in the main paper.

Table 1 presents the list of 44 cities from GeoStyle. 37 of these 44 cities have enough data available on HoodMaps for us to use. We do the quantitative analysis on all 37 of these cities using HM and BD benchmarks. The 8 cities marked red are where we can get publicly available administrative boundary information.

## 4. Quantitative Performance Breakdown

### 4.1. Per-Class Performance for HM Benchmark

We also compare Per-Class performance against the Admin baseline for the 8 cities. Table 2 compares MMIOU for these cities. Our method finds it difficult to discover corporate neighborhoods, while it is better at understanding hipster neighborhoods for these cities. We believe this is because fewer people are posting images of themselves from a corporate environment.



|       | Wea.  | Hip.  | Tou.  | Stu.  | Nor.  | Cor.  |
|-------|-------|-------|-------|-------|-------|-------|
| Admin | 0.315 | 0.327 | 0.269 | 0.261 | 0.260 | 0.168 |
| Ours  | 0.306 | 0.408 | 0.294 | 0.281 | 0.281 | 0.129 |

Table 2: Per class accuracy on HoodMaps (MMIoU) for 8 cities where Admin data is available. On average our method performs better than admin baseline, But our method finds it difficult to find corporate neighborhoods as fewer people post pictures of themselves from a corporate environment.

## 4.2. Per-city Performance

Figure 3 shows the per-city purity measure comparing our method against the best-performing baseline (PID) for the HM benchmark. PID performs better than our method for the cities to the left and our method outperforms PID for the cities to the right. Figure 4 similarly compares our method against admin baseline (PID) for the 8 cities over the HM benchmark. Our method performs better than admin for all the cities.

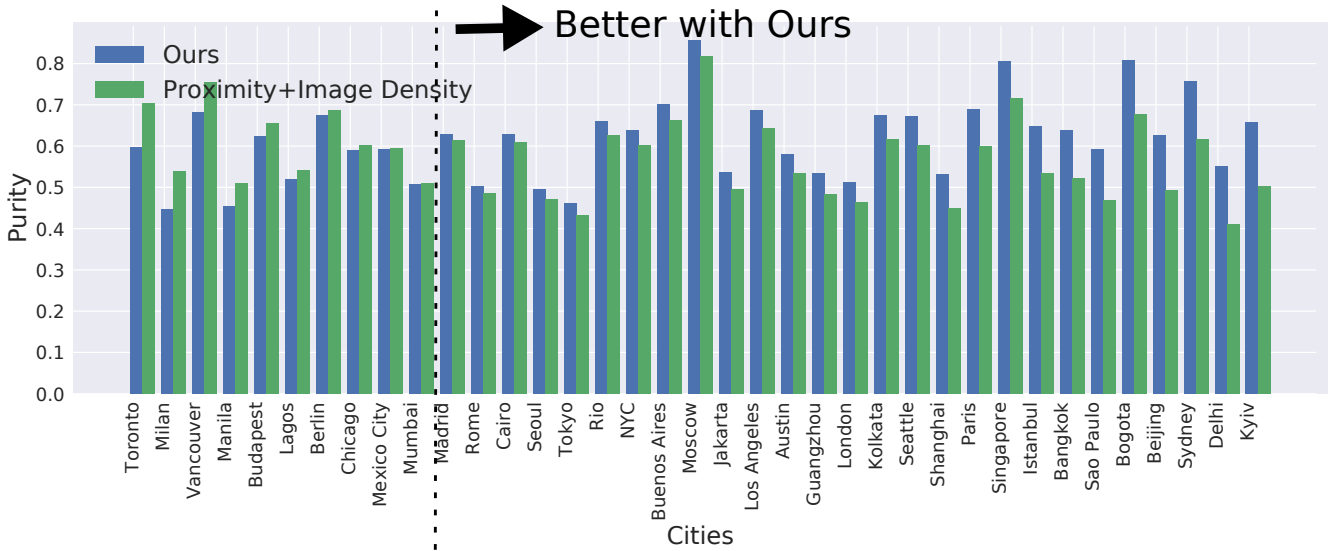

Figure 3: Performance (purity over HM benchmark) of our method against the PID baseline for individual cities. The cities are sorted from left to right by the cities where PID performs best to the cities where our method performs the best. For 27 out of 37 cities, we perform better than the PID baseline.

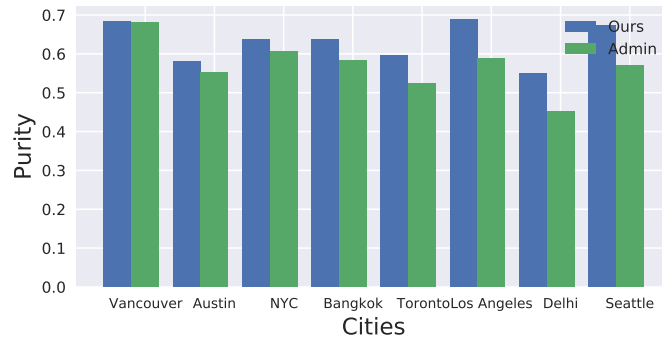

Figure 4: Performance (purity over HM benchmark) of our method against the Admin baseline for all 8 cities where Admin is available. The cities are sorted from left to right by the increasing gain of our method. Our method performs better than Admin for all the cities.



## 5. Ablation Studies

### 5.1. Effect of Radius $r$

We look at how changing the sampling radius affects the performance of our method on the two benchmarks. We increase and decrease the radius by a factor of  $\sqrt{2}$ . Table 3 shows the performance of our method with changing radius  $r$ . The best performance is at  $r = 0.020$ . However, as can be seen by the performance on BD benchmark, changing the radius does not have a huge impact on the performance.

| $r$          | HM Benchmark |              |              | BD Benchmark |              |              |
|--------------|--------------|--------------|--------------|--------------|--------------|--------------|
|              | NMI          | Purity       | MMIoU        | NMI          | Purity       | MMIoU        |
| 0.010        | 0.185        | 0.607        | 0.212        | 0.293        | 0.580        | 0.306        |
| 0.014        | 0.216        | 0.599        | 0.238        | 0.347        | 0.599        | <b>0.336</b> |
| <b>0.020</b> | <b>0.260</b> | <b>0.635</b> | <b>0.272</b> | <b>0.369</b> | <b>0.597</b> | <b>0.339</b> |
| 0.028        | 0.246        | 0.573        | 0.257        | <b>0.369</b> | <b>0.598</b> | <b>0.332</b> |
| 0.04         | 0.240        | 0.584        | 0.254        | 0.350        | 0.576        | 0.325        |

Table 3: Effect of changing sampling radius  $r$  on the performance of neighborhood discovery.

### 5.2. Number of Discovered Clusters

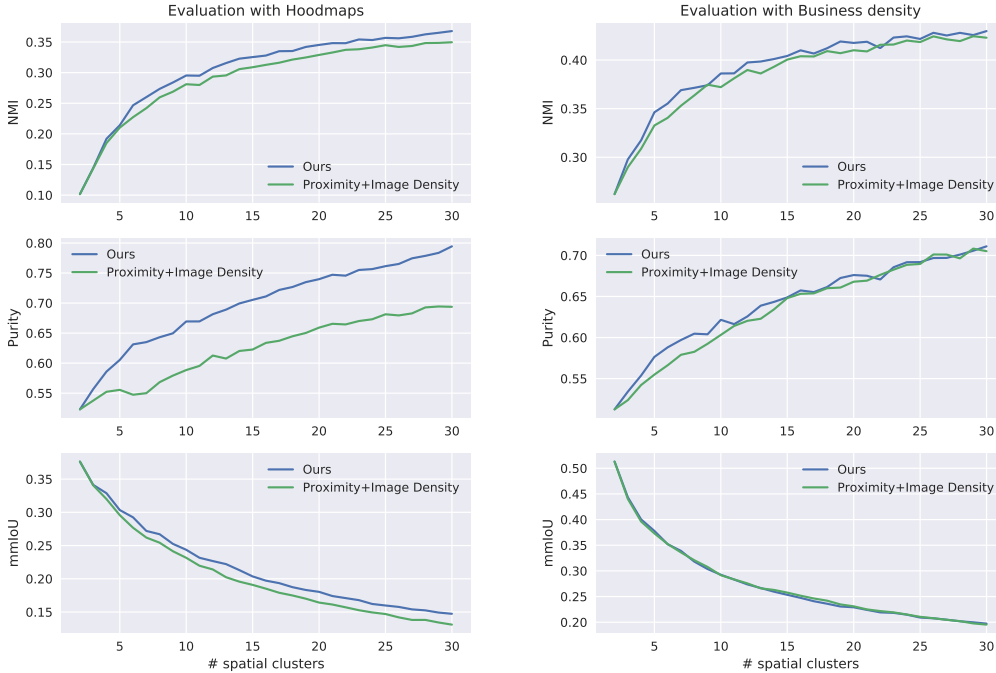

Figure 5: Performance (NMI, Purity and MMIoU) of our method against the PID baseline when varying the number of discovered clusters for HM (left) and BD (right). Our method outperforms the best baseline on all metrics and can be used to discover any number of neighborhoods in a city.

In this section we see how changing the number of spatial clusters affects performance on the evaluation metric. Figure 5 shows the performance when sweeping over the number of spatial clusters for all three unsupervised evaluation metrics over

the two benchmarks. Our method consistently outperforms the baseline method for all metrics (performs on par for MMIOU for the BD benchmark). Hence our conclusions are stable with respect to this parameter setting.

## 6. Experiments with Human Judges

We restrict the Amazon Mechanical Turk workers to perform tasks for cities of their country (approximate way of enforcing a “local” person). Additionally, we add sentinels in our tasks, by duplicating 4 questions out of 20. If the 2 clicked points for the same question are far apart from each other, we do not consider the answers of that worker.

Figure 6 shows the interface as seen by the Mechanical Turk workers. Workers are supposed to look at the set of images as shown on the right and click on the point where they think the images come from (red marker on map). Workers are allowed to zoom in/out on the map, and redo a previously selected image. We additionally also ask for a confidence rating for a click. Note that it is not visible to the workers which method (ours or the baseline) has produced the images. They are simply asked to localize the styles they see.

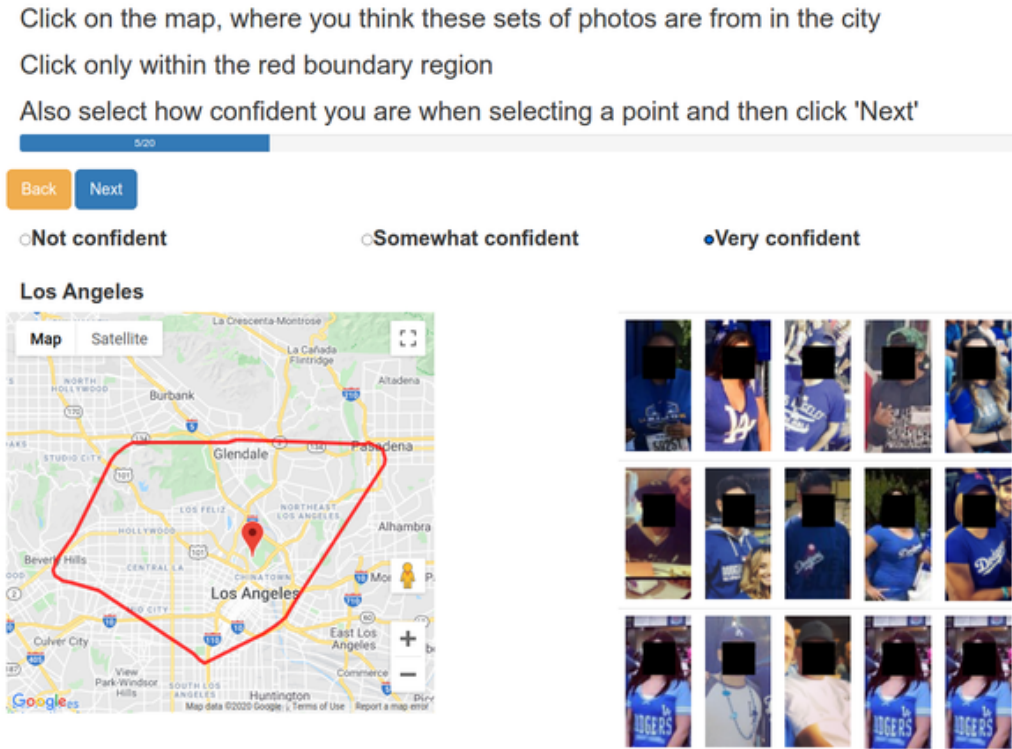

Figure 6: Interface seen by the Amazon Mechanical Turk workers. The instructions can be seen on the top.

## 7. More Qualitative Results

### 7.1. Examples of Unique Neighborhoods

Table 4 shows the list of the top 40 most unique neighborhoods found by our methods. It shows unique regions such as neighborhoods with sports stadiums (Los Angeles, Milan, Chicago, Seattle), tourist areas (Bogota, Beijing (second neighborhood)), beaches (NYC, Sydney (fourth neighborhood)) etc.

### 7.2. Examples of Similar Neighborhoods

Table 5 shows the list of the top 20 most similar neighborhoods found by our methods. It shows similar neighborhoods with tourists (Kyiv-Moscow, Chicago-NYC (first pair)), nightlife (Chicago-NYC (second pair), NYC-Toronto). Note that this measure of similarity only find pairs that are geographically close (due to similar weather and culture).

### 7.3. Examples of Analogical Neighborhoods

Table 6 shows the list of the top 20 tuples of contextually similar neighborhoods, where non-contextual similarity fails to give good similar neighborhoods. The first and second column are our contextually similar neighborhoods. The third column shows the neighborhood produced by simpler similarity search. Note that most of the pairs are from cities that are geographically far (where non-contextual similarity faces more challenges). The first example finds similar tourist regions in culturally different cities Istanbul (neighborhood around Hagia Sophia) and Rome (neighborhoods around Colosseum and Vatican City).



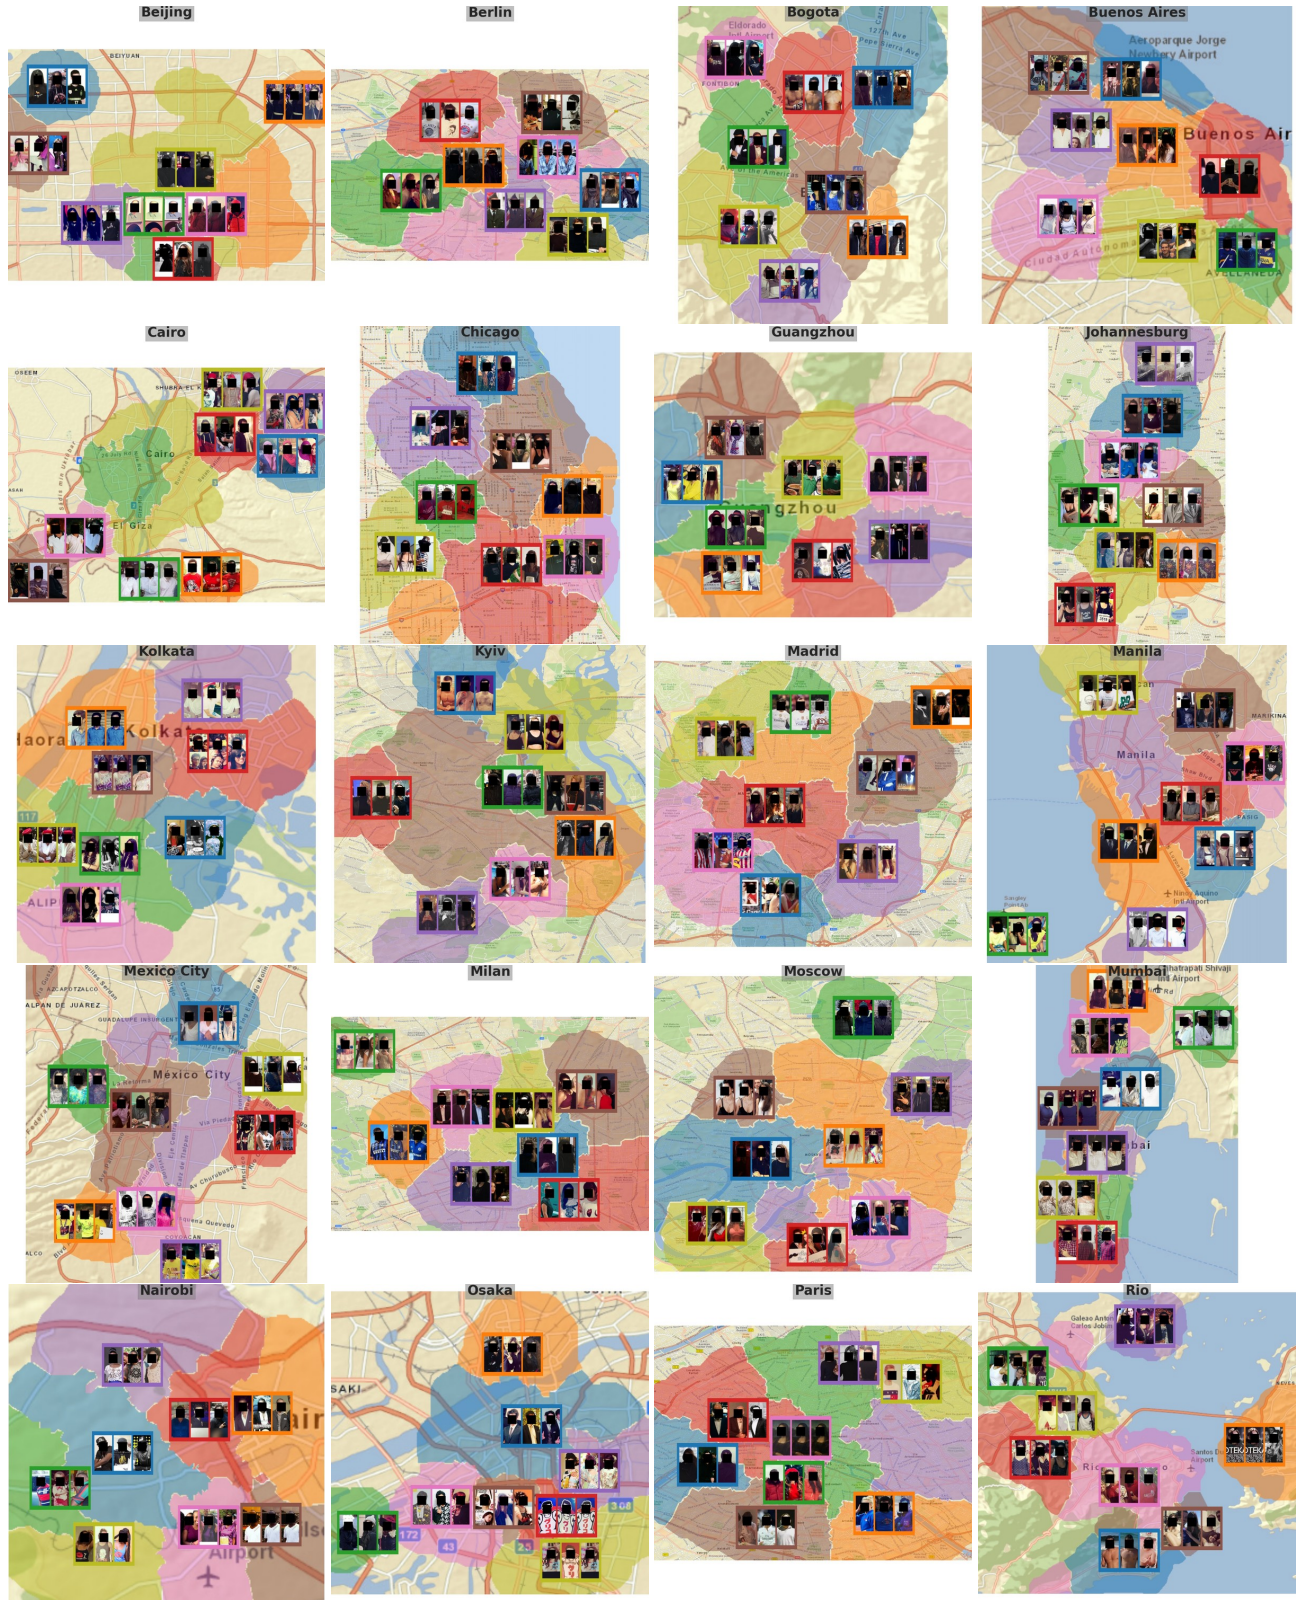

Figure 7: Underground maps for 20 of the cities. Our model uses fashion to discover neighborhoods of cities. For example, in Madrid (green and pink) and London (brown and green) we discover neighborhoods with sports arenas. We also discover tourists areas in cities such as Beijing (red).



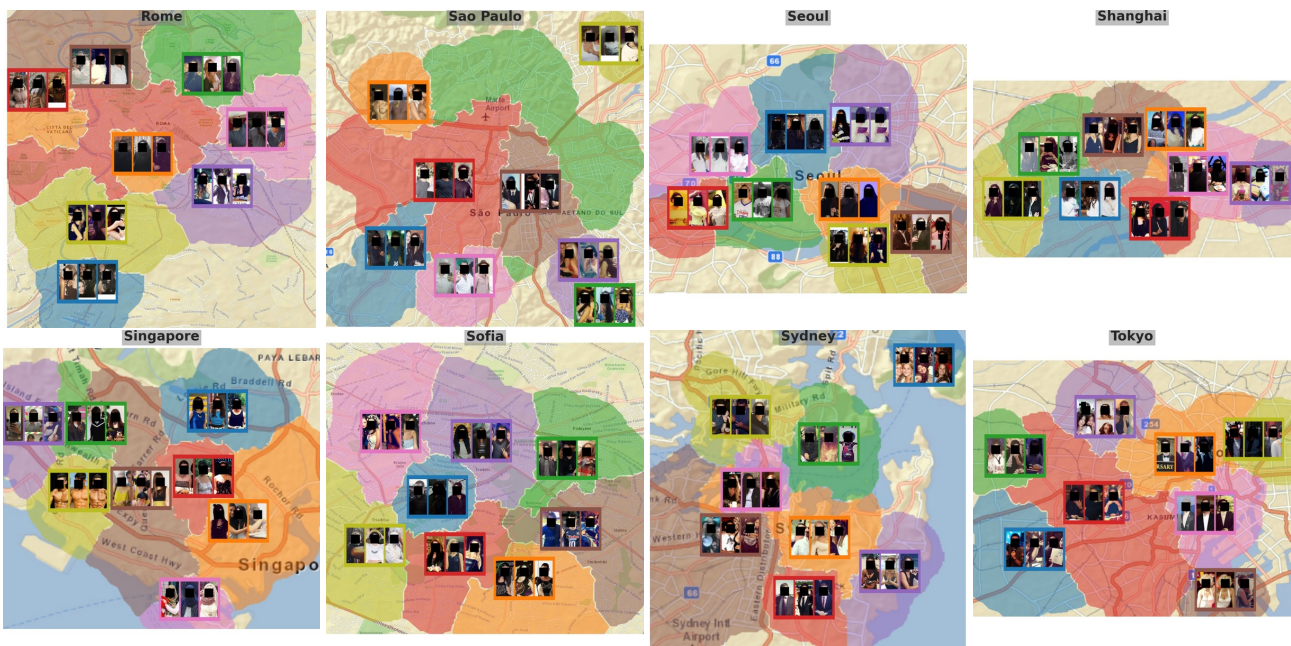

Figure 8: Underground maps for 8 more cities. We discover popular beaches in Rio (blue) and Sydney (purple). We also discover two geographically apart tourist regions in Rome (orange).

| Unique Neighborhood/City                                                                             | Images/Top Attributes                                                                                                                                                                                                            | Unique Neighborhood/City                                                                           | Images/Top Attributes                                                                                                                                                                                                                         |
|------------------------------------------------------------------------------------------------------|----------------------------------------------------------------------------------------------------------------------------------------------------------------------------------------------------------------------------------|----------------------------------------------------------------------------------------------------|-----------------------------------------------------------------------------------------------------------------------------------------------------------------------------------------------------------------------------------------------|
|  <p>Los Angeles</p> |  <p>major color::Blue<br/>wearing hat::Yes<br/>sleeve length::Short sleeve<br/>clothing category::T-shirt<br/>clothing pattern::Graphics</p>    |  <p>Milan</p>    |  <p>major color::Red<br/>clothing pattern::Graphics<br/>wearing hat::Yes<br/>clothing category::T-shirt<br/>major color::Blue</p>                          |
|  <p>Shanghai</p>    |  <p>major color::Green<br/>clothing pattern::Spotted<br/>major color::Red<br/>major color::Gray<br/>clothing category::Sweater</p>              |  <p>Bangkok</p>  |  <p>clothing pattern::Striped<br/>major color::More than 1 color<br/>clothing pattern::Plaid<br/>clothing category::Dress<br/>sleeve length::No sleeve</p> |
|  <p>Bogota</p>    |  <p>wearing scarf::Yes<br/>wearing glasses::Yes<br/>clothing category::Outerwear<br/>wearing jacket::Yes<br/>major color::Gray</p>            |  <p>Kyiv</p>   |  <p>wearing hat::Yes<br/>major color::Green<br/>major color::Orange<br/>wearing necktie::Yes<br/>neckline shape::Folded</p>                              |
|  <p>Chicago</p>   |  <p>major color::Red<br/>clothing pattern::Graphics<br/>clothing category::T-shirt<br/>collar presence::No<br/>clothing category::Sweater</p> |  <p>Sydney</p> |  <p>wearing hat::Yes<br/>major color::Pink<br/>major color::Blue<br/>wearing scarf::Yes<br/>major color::More than 1 color</p>                           |



| Unique Neighborhood/City | Images/Top Attributes                                                                                                                                                                                                                                                                                                                                                                     | Unique Neighborhood/City | Images/Top Attributes                                                                                                                                                                                                                                                                                                                                                                    |
|--------------------------|-------------------------------------------------------------------------------------------------------------------------------------------------------------------------------------------------------------------------------------------------------------------------------------------------------------------------------------------------------------------------------------------|--------------------------|------------------------------------------------------------------------------------------------------------------------------------------------------------------------------------------------------------------------------------------------------------------------------------------------------------------------------------------------------------------------------------------|
| Rome                     |   <p>           clothing category::Tank top<br/>           sleeve length::No sleeve<br/>           wearing hat::No<br/>           major color::Black<br/>           neckline shape::V-shape         </p>                | Nairobi                  |   <p>           major color::Brown<br/>           major color::White<br/>           wearing scarf::Yes<br/>           clothing pattern::Striped<br/>           major color::Pink         </p>                       |
| Nairobi                  |   <p>           sleeve length::Short sleeve<br/>           major color::Green<br/>           clothing category::T-shirt<br/>           clothing category::Outerwear<br/>           neckline shape::V-shape         </p> | Milan                    |   <p>           wearing glasses::Yes<br/>           major color::More than 1 color<br/>           major color::Cyan<br/>           major color::Purple<br/>           wearing necktie::No         </p>              |
| Nairobi                  |   <p>           major color::Blue<br/>           wearing glasses::Yes<br/>           neckline shape::Round<br/>           major color::Red<br/>           clothing category::Tank top         </p>                  | Singapore                |   <p>           major color::Gray<br/>           sleeve length::Short sleeve<br/>           major color::Green<br/>           multiple layers::One layer<br/>           clothing category::T-shirt         </p> |
| Moscow                   |   <p>           wearing hat::Yes<br/>           major color::Orange<br/>           collar presence::No<br/>           major color::Blue<br/>           wearing necktie::No         </p>                             | Beijing                  |   <p>           clothing category::Shirt<br/>           clothing pattern::Spotted<br/>           major color::White<br/>           clothing pattern::Graphics<br/>           wearing hat::No         </p>       |

| Unique Neighborhood/City                                                                           | Images/Top Attributes                                                                                                                                                                                                               | Unique Neighborhood/City                                                                                 | Images/Top Attributes                                                                                                                                                                                                            |
|----------------------------------------------------------------------------------------------------|-------------------------------------------------------------------------------------------------------------------------------------------------------------------------------------------------------------------------------------|----------------------------------------------------------------------------------------------------------|----------------------------------------------------------------------------------------------------------------------------------------------------------------------------------------------------------------------------------|
| 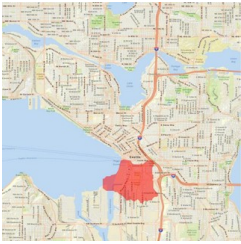 <p>Seattle</p>   |  <p>wearing hat::Yes<br/>major color::Green<br/>clothing pattern::Graphics<br/>major color::Yellow<br/>clothing category::T-shirt</p>              |  <p>Dhaka</p>          |  <p>major color::Cyan<br/>clothing category::Outerwear<br/>major color::Black<br/>major color::Brown<br/>multiple layers::Multiple layers</p> |
|  <p>Sofia</p>     |  <p>major color::Orange<br/>clothing category::Sweater<br/>clothing pattern::Floral<br/>clothing pattern::Spotted<br/>clothing pattern::Plaid</p>  |  <p>Cairo</p>          |  <p>wearing glasses::Yes<br/>major color::Cyan<br/>wearing hat::Yes<br/>major color::Black<br/>major color::More than 1 color</p>             |
|  <p>Madrid</p>  |  <p>major color::Purple<br/>major color::Cyan<br/>neckline shape::Round<br/>wearing jacket::No<br/>multiple layers::One layer</p>                |  <p>Johannesburg</p> |  <p>major color::Cyan<br/>neckline shape::Round<br/>clothing category::Tank top<br/>major color::White<br/>collar presence::No</p>          |
|  <p>Kolkata</p> |  <p>multiple layers::Multiple layers<br/>clothing category::Outerwear<br/>wearing jacket::Yes<br/>major color::Purple<br/>wearing scarf::Yes</p> |  <p>Johannesburg</p> |  <p>clothing category::Dress<br/>clothing pattern::Plaid<br/>major color::Orange<br/>clothing category::Shirt<br/>wearing glasses::No</p>   |

| Unique Neighborhood/City                                                                           | Images/Top Attributes                                                                                                                                                                                               | Unique Neighborhood/City                                                                       | Images/Top Attributes                                                                                                                                                                                                           |
|----------------------------------------------------------------------------------------------------|---------------------------------------------------------------------------------------------------------------------------------------------------------------------------------------------------------------------|------------------------------------------------------------------------------------------------|---------------------------------------------------------------------------------------------------------------------------------------------------------------------------------------------------------------------------------|
| <br>Kyiv          | <br>major color::Blue<br>clothing pattern::Plaid<br>major color::Cyan<br>wearing glasses::No<br>major color::Black                 | <br>Dhaka    | <br>wearing scarf::Yes<br>major color::Orange<br>neckline shape::V-shape<br>major color::Red<br>major color::Pink                            |
| <br>Sydney        | <br>wearing necktie::Yes<br>clothing category::Suit<br>major color::Yellow<br>major color::Red<br>collar presence::Yes             | <br>Manila   | <br>major color::Yellow<br>major color::Blue<br>major color::Pink<br>wearing hat::Yes<br>clothing pattern::Floral                            |
| <br>Sydney      | <br>neckline shape::Round<br>clothing pattern::Floral<br>wearing jacket::No<br>collar presence::No<br>multiple layers::One layer | <br>Sydney | <br>major color::Brown<br>clothing category::Tank top<br>sleeve length::No sleeve<br>neckline shape::V-shape<br>multiple layers::One layer |
| <br>Mexico City | <br>clothing pattern::Graphics<br>wearing necktie::No<br>wearing glasses::Yes<br>clothing category::T-shirt<br>wearing hat::Yes  | <br>Sofia  | <br>major color::Green<br>major color::Gray<br>major color::Brown<br>major color::Yellow<br>clothing category::Sweater                     |



| Unique Neighborhood/City                                                                            | Images/Top Attributes                                                                                                                                                                                                       | Unique Neighborhood/City                                                                             | Images/Top Attributes                                                                                                                                                                                                              |
|-----------------------------------------------------------------------------------------------------|-----------------------------------------------------------------------------------------------------------------------------------------------------------------------------------------------------------------------------|------------------------------------------------------------------------------------------------------|------------------------------------------------------------------------------------------------------------------------------------------------------------------------------------------------------------------------------------|
| 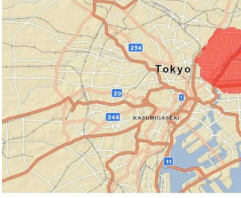<br>Tokyo          | <br>major color::More than 1 color<br>clothing category::Outerwear<br>major color::Blue<br>clothing pattern::Plaid<br>wearing glasses::Yes | <br>Seattle        | <br>neckline shape::V-shape<br>clothing category::Suit<br>wearing necktie::Yes<br>sleeve length::No sleeve<br>clothing category::Dress          |
| <br>Madrid         | <br>sleeve length::Short sleeve<br>clothing pattern::Graphics<br>collar presence::Yes<br>clothing category::T-shirt<br>major color::White  | <br>Chicago        | <br>major color::Yellow<br>wearing glasses::Yes<br>major color::White<br>clothing pattern::Plaid<br>sleeve length::Short sleeve                 |
| <br>Johannesburg | <br>neckline shape::V-shape<br>wearing hat::No<br>clothing pattern::Spotted<br>wearing scarf::No<br>collar presence::Yes                 | <br>Beijing      | <br>major color::More than 1 color<br>wearing glasses::Yes<br>clothing pattern::Striped<br>wearing scarf::Yes<br>clothing category::Outerwear |
| <br>NYC          | <br>wearing glasses::Yes<br>collar presence::No<br>wearing necktie::No<br>clothing category::Tank top<br>neckline shape::V-shape         | <br>Johannesburg | <br>major color::Orange<br>wearing glasses::Yes<br>multiple layers::One layer<br>clothing category::Tank top<br>wearing jacket::No            |

Table 4: (Left to right, then top to bottom) List of top 40 unique neighborhoods. Top attributes are the relatively most frequent attributes in a neighborhood. For instance, the second example shows the neighborhood of Milan with two famous football clubs with their stadiums and people wearing colors of the clubs. The fourth example shows a neighborhood in Bangkok with white and striped dresses.

| Neighborhood/City                                                                 | Images                                                                              | Similar Neighborhood/City                                                           | Images                                                                               | Top Attributes                                                                                                                          |                                                                                                                          |
|-----------------------------------------------------------------------------------|-------------------------------------------------------------------------------------|-------------------------------------------------------------------------------------|--------------------------------------------------------------------------------------|-----------------------------------------------------------------------------------------------------------------------------------------|--------------------------------------------------------------------------------------------------------------------------|
| 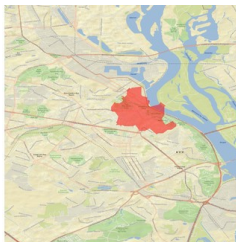 |    |    |    | major color::Black<br>major color::Brown<br>neckline shape::Folded<br>multiple layers::Multiple layers<br>wearing jacket::Yes           |                                                                                                                          |
| Kyiv                                                                              |    |    |    | clothing category::Shirt<br>clothing pattern::Plaid<br>collar presence::Yes<br>wearing scarf::No<br>neckline shape::V-shape             |                                                                                                                          |
| Kyiv                                                                              |   |   |    |                                                      | wearing hat::No<br>clothing pattern::Spotted<br>clothing pattern::Solid<br>major color::Black<br>clothing category::Suit |
| NYC                                                                               |  |  |  | wearing scarf::Yes<br>neckline shape::Folded<br>wearing jacket::Yes<br>multiple layers::Multiple layers<br>clothing category::Outerwear |                                                                                                                          |
| Chicago                                                                           |  |  |  | neckline shape::V-shape<br>wearing hat::No<br>clothing pattern::Solid<br>clothing pattern::Spotted<br>clothing category::Dress          |                                                                                                                          |
| Chicago                                                                           |                                                                                     | NYC                                                                                 |                                                                                      |                                                                                                                                         |                                                                                                                          |



| Neighborhood/City                                                                   | Images                                                                              | Similar Neighborhood/City                                                           | Images                                                                               | Top Attributes                                                                                                                         |
|-------------------------------------------------------------------------------------|-------------------------------------------------------------------------------------|-------------------------------------------------------------------------------------|--------------------------------------------------------------------------------------|----------------------------------------------------------------------------------------------------------------------------------------|
| 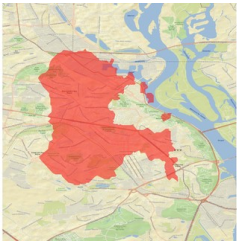   |    |    |    | major color::Black<br>clothing pattern::Solid<br>clothing category::Shirt<br>neckline shape::V-shape<br>clothing category::Dress       |
| Kyiv                                                                                |                                                                                     | Moscow                                                                              |                                                                                      |                                                                                                                                        |
|    |    |    |    | clothing category::Suit<br>wearing necktie::Yes<br>collar presence::Yes<br>clothing pattern::Solid<br>multiple layers::Multiple layers |
| London                                                                              |                                                                                     | Paris                                                                               |                                                                                      |                                                                                                                                        |
|   |   |   |   | clothing category::Suit<br>wearing hat::No<br>collar presence::Yes<br>wearing necktie::Yes<br>neckline shape::V-shape                  |
| Chicago                                                                             |                                                                                     | Toronto                                                                             |                                                                                      |                                                                                                                                        |
|  |  |  |  | wearing scarf::Yes<br>neckline shape::Folded<br>sleeve length::Long sleeve<br>wearing jacket::Yes<br>multiple layers::Multiple layers  |
| Chicago                                                                             |                                                                                     | Seattle                                                                             |                                                                                      |                                                                                                                                        |
|  |  |  |  | clothing category::Dress<br>clothing category::Sweater<br>major color::Black<br>clothing pattern::Solid<br>neckline shape::V-shape     |
| Osaka                                                                               |                                                                                     | Tokyo                                                                               |                                                                                      |                                                                                                                                        |



| Neighborhood/City                                                                 | Images                                                                              | Similar Neighborhood/City                                                         | Images                                                                               | Top Attributes                                                                                                                          |
|-----------------------------------------------------------------------------------|-------------------------------------------------------------------------------------|-----------------------------------------------------------------------------------|--------------------------------------------------------------------------------------|-----------------------------------------------------------------------------------------------------------------------------------------|
|  |    |  |    | major color::Brown<br>sleeve length::Long sleeve<br>wearing jacket::Yes<br>multiple layers::Multiple layers<br>wearing scarf::Yes       |
| Milan                                                                             |    | Rome                                                                              |    | wearing glasses::Yes<br>wearing scarf::Yes<br>major color::Brown<br>clothing category::Outerwear<br>multiple layers::Multiple layers    |
| Madrid                                                                            |   | Rome                                                                              |   | wearing scarf::Yes<br>sleeve length::Long sleeve<br>multiple layers::Multiple layers<br>wearing jacket::Yes<br>wearing glasses::Yes     |
| Buenos Aires                                                                      |  | Madrid                                                                            |   | sleeve length::Long sleeve<br>multiple layers::Multiple layers<br>major color::Brown<br>wearing jacket::Yes<br>wearing scarf::Yes       |
| London                                                                            |  | Milan                                                                             |  | clothing pattern::Plaid<br>sleeve length::Long sleeve<br>clothing category::Outerwear<br>clothing category::Shirt<br>major color::Black |
| Los Angeles                                                                       |  | Sydney                                                                            |   |                                                                                                                                         |

| Neighborhood/City                                                                 | Images                                                                              | Similar Neighborhood/City                                                           | Images                                                                               | Top Attributes                                                                                                                       |
|-----------------------------------------------------------------------------------|-------------------------------------------------------------------------------------|-------------------------------------------------------------------------------------|--------------------------------------------------------------------------------------|--------------------------------------------------------------------------------------------------------------------------------------|
|  |    |    |    | wearing scarf::Yes<br>major color::Brown<br>multiple layers::Multiple layers<br>clothing category::Outerwear<br>wearing glasses::Yes |
| London                                                                            |    |    |    | sleeve length::Long sleeve<br>major color::Brown<br>wearing jacket::Yes<br>multiple layers::Multiple layers<br>wearing scarf::Yes    |
| London                                                                            |   |   |   | major color::Gray<br>major color::Brown<br>major color::More than 1 color<br>clothing pattern::Plaid<br>clothing category::Sweater   |
| Los Angeles                                                                       |  |  |  | major color::More than 1 color<br>major color::Cyan<br>clothing pattern::Striped<br>major color::Gray<br>clothing pattern::Plaid     |
| Berlin                                                                            |  |  |  | neckline shape::V-shape<br>clothing pattern::Solid<br>clothing pattern::Spotted<br>major color::Black<br>clothing category::Dress    |
| Los Angeles                                                                       |  | NYC                                                                                 |                                                                                      |                                                                                                                                      |

Table 5: List of top 20 most similar neighborhoods. Top attributes are the relatively most frequent attributes common in both the neighborhoods. For instance, the fourth row, shows that the tourist regions of Chicago and NYC are similar.



| Neighborhood/City                                                                                                               | Images                                                                              | Contextually Similar Neighborhood/City                                                                                                                         | Images                                                                               | Similar Neighborhood                                                                                                                                      | Images                                                                                |
|---------------------------------------------------------------------------------------------------------------------------------|-------------------------------------------------------------------------------------|----------------------------------------------------------------------------------------------------------------------------------------------------------------|--------------------------------------------------------------------------------------|-----------------------------------------------------------------------------------------------------------------------------------------------------------|---------------------------------------------------------------------------------------|
| <br>Istanbul<br><b>Common Attributes:</b>      |    | <br>↔ Rome<br>wearing scarf::Yes<br>wearing hat::Yes                          |    | <br>Rome<br>wearing glasses::Yes<br>clothing category::Outerwear       |    |
| <br>Jakarta<br><b>Common Attributes:</b>       |    | <br>↔ Sao Paulo<br>collar presence::Yes<br>clothing category::Shirt           |    | <br>Sao Paulo<br>clothing pattern::Solid<br>major color::Black         |    |
| <br>Los Angeles<br><b>Common Attributes:</b> |  | <br>↔ Singapore<br>neckline shape::V-shape<br>sleeve length::No sleeve      |  | <br>Singapore<br>clothing category::Dress<br>clothing pattern::Solid |  |
| <br>Sydney<br><b>Common Attributes:</b>      |  | <br>↔ Sao Paulo<br>clothing pattern::Solid<br>sleeve length::Long<br>sleeve |  | <br>Sao Paulo<br>major color::Black<br>wearing hat::No               |  |

| Neighborhood/City                                                                                                                | Images                                                                              | Contextually Similar Neighborhood/City                                                                                                                     | Images                                                                               | Similar Neighborhood                                                                                                                                       | Images                                                                                |
|----------------------------------------------------------------------------------------------------------------------------------|-------------------------------------------------------------------------------------|------------------------------------------------------------------------------------------------------------------------------------------------------------|--------------------------------------------------------------------------------------|------------------------------------------------------------------------------------------------------------------------------------------------------------|---------------------------------------------------------------------------------------|
| <br>NYC<br><b>Common Attributes:</b>            |    | <br>↔ Mexico City<br>neckline shape::V-shape<br>wearing hat::No           |    | <br>Mexico City<br>clothing pattern::Solid<br>major color::Purple       |    |
| <br>Berlin<br><b>Common Attributes:</b>         |    | <br>↔ Rome<br>wearing glasses::Yes<br>multiple layers::Multiple layers    |    | <br>Rome<br>wearing scarf::Yes<br>clothing category::Outerwear          |    |
| <br>Osaka<br><b>Common Attributes:</b>        |  | <br>↔ Bogota<br>clothing pattern::Solid<br>wearing hat::No              |  | <br>Bogota<br>clothing category::Shirt<br>clothing category::Suit     |  |
| <br>Buenos Aires<br><b>Common Attributes:</b> |  | <br>↔ Berlin<br>sleeve length::Long<br>sleeve<br>neckline shape::Folded |  | <br>Berlin<br>multiple layers::Multiple layers<br>wearing jacket::Yes |  |



| Neighborhood/City                                                                                                             | Images                                                                              | Contextually Similar Neighborhood/City                                                                                                                       | Images                                                                               | Similar Neighborhood                                                                                                                                        | Images                                                                                |
|-------------------------------------------------------------------------------------------------------------------------------|-------------------------------------------------------------------------------------|--------------------------------------------------------------------------------------------------------------------------------------------------------------|--------------------------------------------------------------------------------------|-------------------------------------------------------------------------------------------------------------------------------------------------------------|---------------------------------------------------------------------------------------|
| <br>Singapore<br><b>Common Attributes:</b>   |    | <br>↔ Mexico City<br>neckline shape::V-shape<br>clothing category::Suit     |    | <br>Mexico City<br>clothing category::Dress<br>clothing pattern::Floral  |    |
| <br>Sao Paulo<br><b>Common Attributes:</b>   |    | <br>↔ Buenos Aires<br>major color::Gray<br>multiple layers::Multiple layers |    | <br>Buenos Aires<br>sleeve length::Long<br>sleeve<br>wearing jacket::Yes |    |
| <br>Seoul<br><b>Common Attributes:</b>     |  | <br>↔ Rome<br>wearing scarf::Yes<br>clothing category::Outerwear          |  | <br>Rome<br>wearing glasses::Yes<br>neckline shape::Folded             |  |
| <br>Sao Paulo<br><b>Common Attributes:</b> |  | <br>↔ Mexico City<br>neckline shape::V-shape<br>wearing hat::No           |  | <br>Mexico City<br>clothing pattern::Solid<br>clothing category::Shirt |  |



| Neighborhood/City                                                                                                                 | Images                                                                              | Contextually Similar Neighborhood/City                                                                                                                                | Images                                                                               | Similar Neighborhood                                                                                                                                                          | Images                                                                                |
|-----------------------------------------------------------------------------------------------------------------------------------|-------------------------------------------------------------------------------------|-----------------------------------------------------------------------------------------------------------------------------------------------------------------------|--------------------------------------------------------------------------------------|-------------------------------------------------------------------------------------------------------------------------------------------------------------------------------|---------------------------------------------------------------------------------------|
| 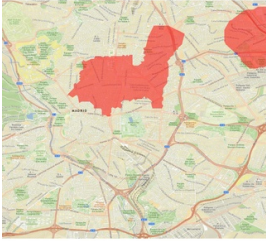<br><b>Madrid</b><br><b>Common Attributes:</b>   |    | <br>↔ <b>Mexico City</b><br>neckline shape::V-shape<br>wearing hat::No               |    | <br><b>Mexico City</b><br>clothing category::Suit<br>wearing necktie::Yes                  |    |
| <br><b>Bogota</b><br><b>Common Attributes:</b>   |    | <br>↔ <b>Singapore</b><br>clothing pattern::Solid<br>clothing category::Dress        |    | <br><b>Singapore</b><br>wearing hat::No<br>clothing pattern::Floral                        |    |
| <br><b>Moscow</b><br><b>Common Attributes:</b> |  | <br>↔ <b>Sao Paulo</b><br>clothing pattern::Solid<br>wearing hat::No               |  | <br><b>Sao Paulo</b><br>major color::Black<br>major color::Brown                         |  |
| <br><b>Rio</b><br><b>Common Attributes:</b>    |  | <br>↔ <b>Buenos Aires</b><br>collar presence::Yes<br>sleeve length::Long<br>sleeve |  | <br><b>Buenos Aires</b><br>neckline shape::Folded<br>multiple layers::Multiple<br>layers |  |

| Neighborhood/City                                                                   | Images                                                                              | Contextually Similar Neighborhood/City                                              | Images                                                                               | Similar Neighborhood                                                                  | Images                                                                                |
|-------------------------------------------------------------------------------------|-------------------------------------------------------------------------------------|-------------------------------------------------------------------------------------|--------------------------------------------------------------------------------------|---------------------------------------------------------------------------------------|---------------------------------------------------------------------------------------|
| 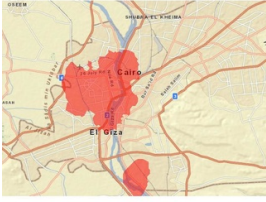   |    |    |    |    |    |
| Cairo<br><b>Common Attributes:</b>                                                  |                                                                                     | ↔ Los Angeles<br>neckline shape::V-shape<br>wearing scarf::No                       |                                                                                      | Los Angeles<br>clothing pattern::Solid<br>sleeve length::No sleeve                    |                                                                                       |
|    |    |    |    |    |    |
| Jakarta<br><b>Common Attributes:</b>                                                |                                                                                     | ↔ Sao Paulo<br>major color::Black<br>clothing pattern::Plaid                        |                                                                                      | Sao Paulo<br>clothing category::Shirt<br>collar presence::Yes                         |                                                                                       |
|   |   |   |   |   |   |
| Manila<br><b>Common Attributes:</b>                                                 |                                                                                     | ↔ Sao Paulo<br>major color::Brown<br>major color::Black                             |                                                                                      | Sao Paulo<br>clothing pattern::Solid<br>clothing category::Shirt                      |                                                                                       |
|  |  |  |  |  |  |
| London<br><b>Common Attributes:</b>                                                 |                                                                                     | ↔ Berlin<br>neckline shape::Folded<br>wearing scarf::Yes                            |                                                                                      | Berlin<br>multiple layers::Multiple layers<br>wearing jacket::Yes                     |                                                                                       |

Table 6: Top 20 most contextually similar neighborhoods (left pairs), where simpler similarity results in a different neighborhood (right). As can be seen from the examples, this is typically the case when 2 cities are geographically and culturally far apart. For instance, in the first example two tourist neighborhoods of Istanbul and Rome are correctly identified as similar, but they are not found without contextual encoding. Top attributes are the relatively most frequent attributes common in the two neighborhoods.

## 8. Grouping step

The grouping step in Sec. 3.3 mapping locations to neighborhoods via their style encodings is simple but effective—more effective than other more elaborate variants we explored. For example, we tried affinity propagation instead of K-means for clustering, but its neighborhoods tended to perform worse than K-means when adjusted to produce the same number of clusters on our benchmarks. We also tried an exponential weighting scheme for feature  $\mathbf{h}_x$ , where the contribution of an image with location  $\mathbf{l}_i$  to a histogram for location  $\mathbf{x}$  is weighted inversely by an exponentiation of  $\|\mathbf{l}_i - \mathbf{x}\|_2$ . This can be thought of as a softer version of the features in Sec. 3.2 in the main paper. It performed similarly to hard features, and hence we kept the simple version for evaluation.
